# Supplementary material
Source: PubMed Central journal article supplement (PMC7739195)

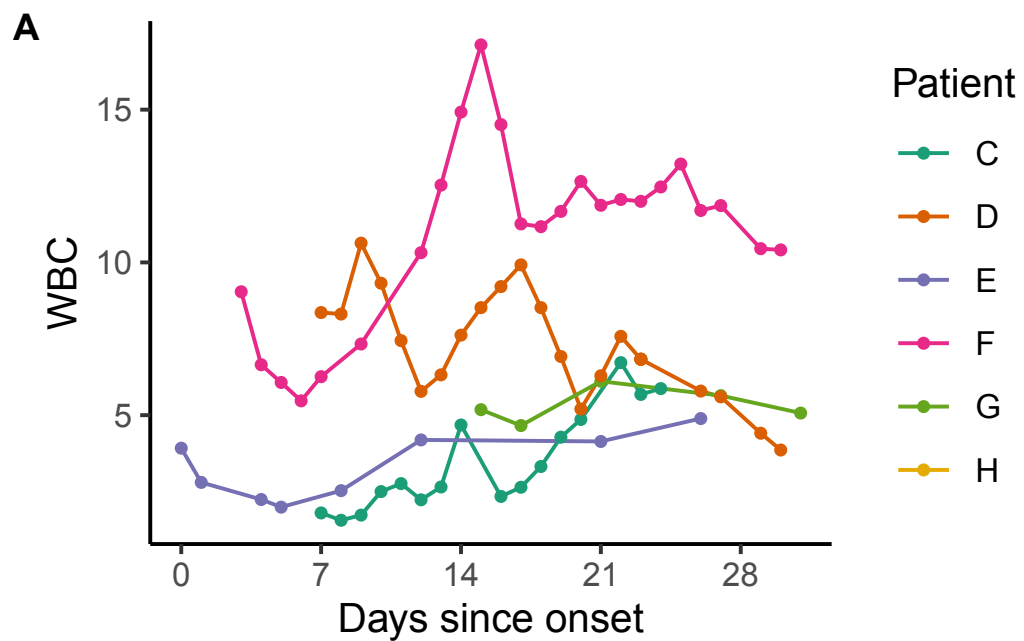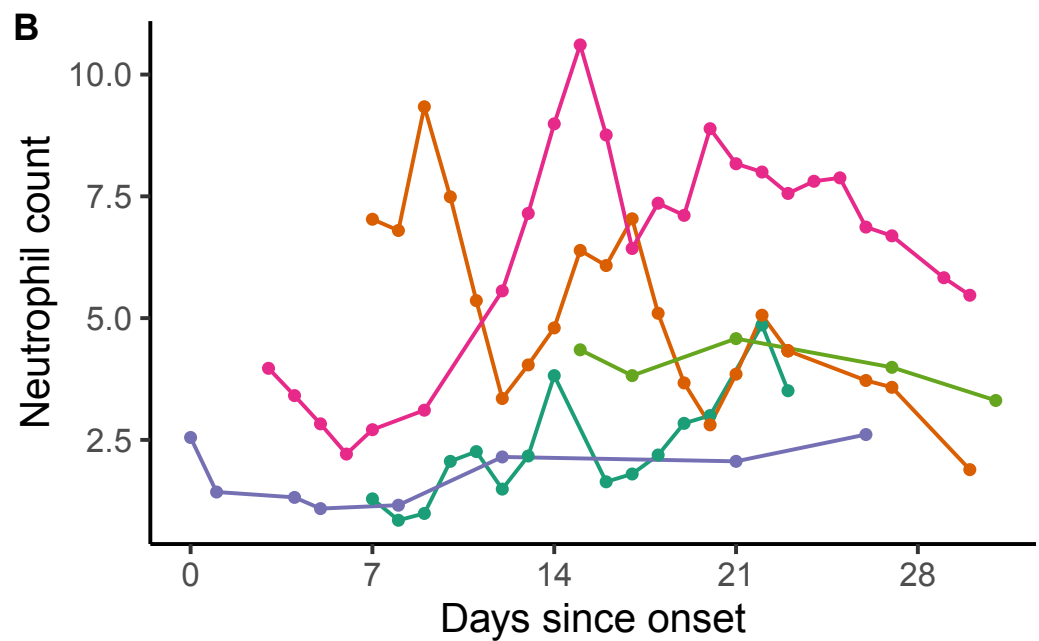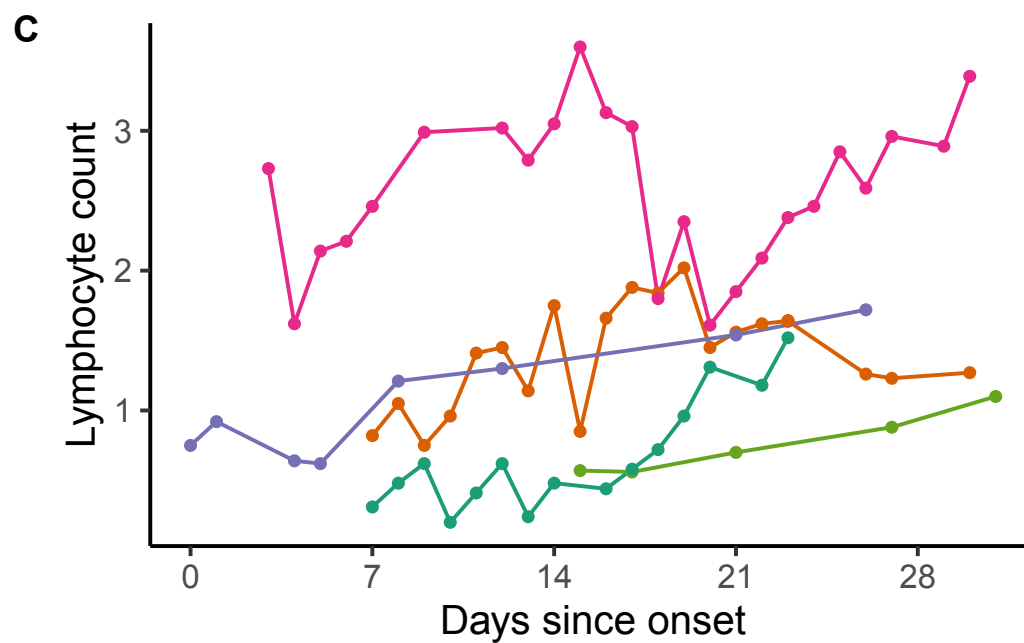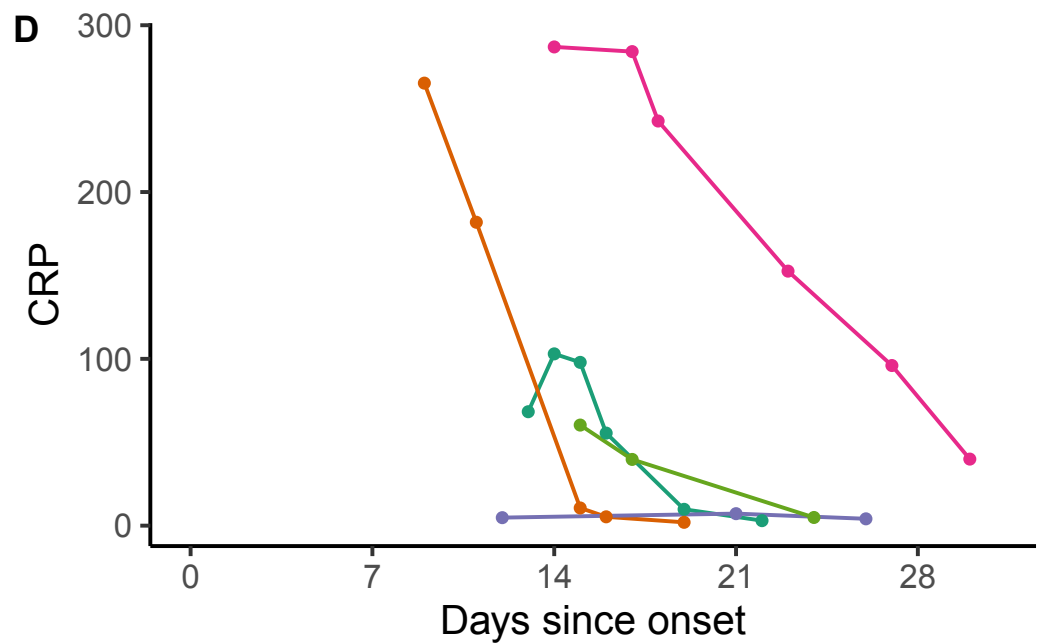

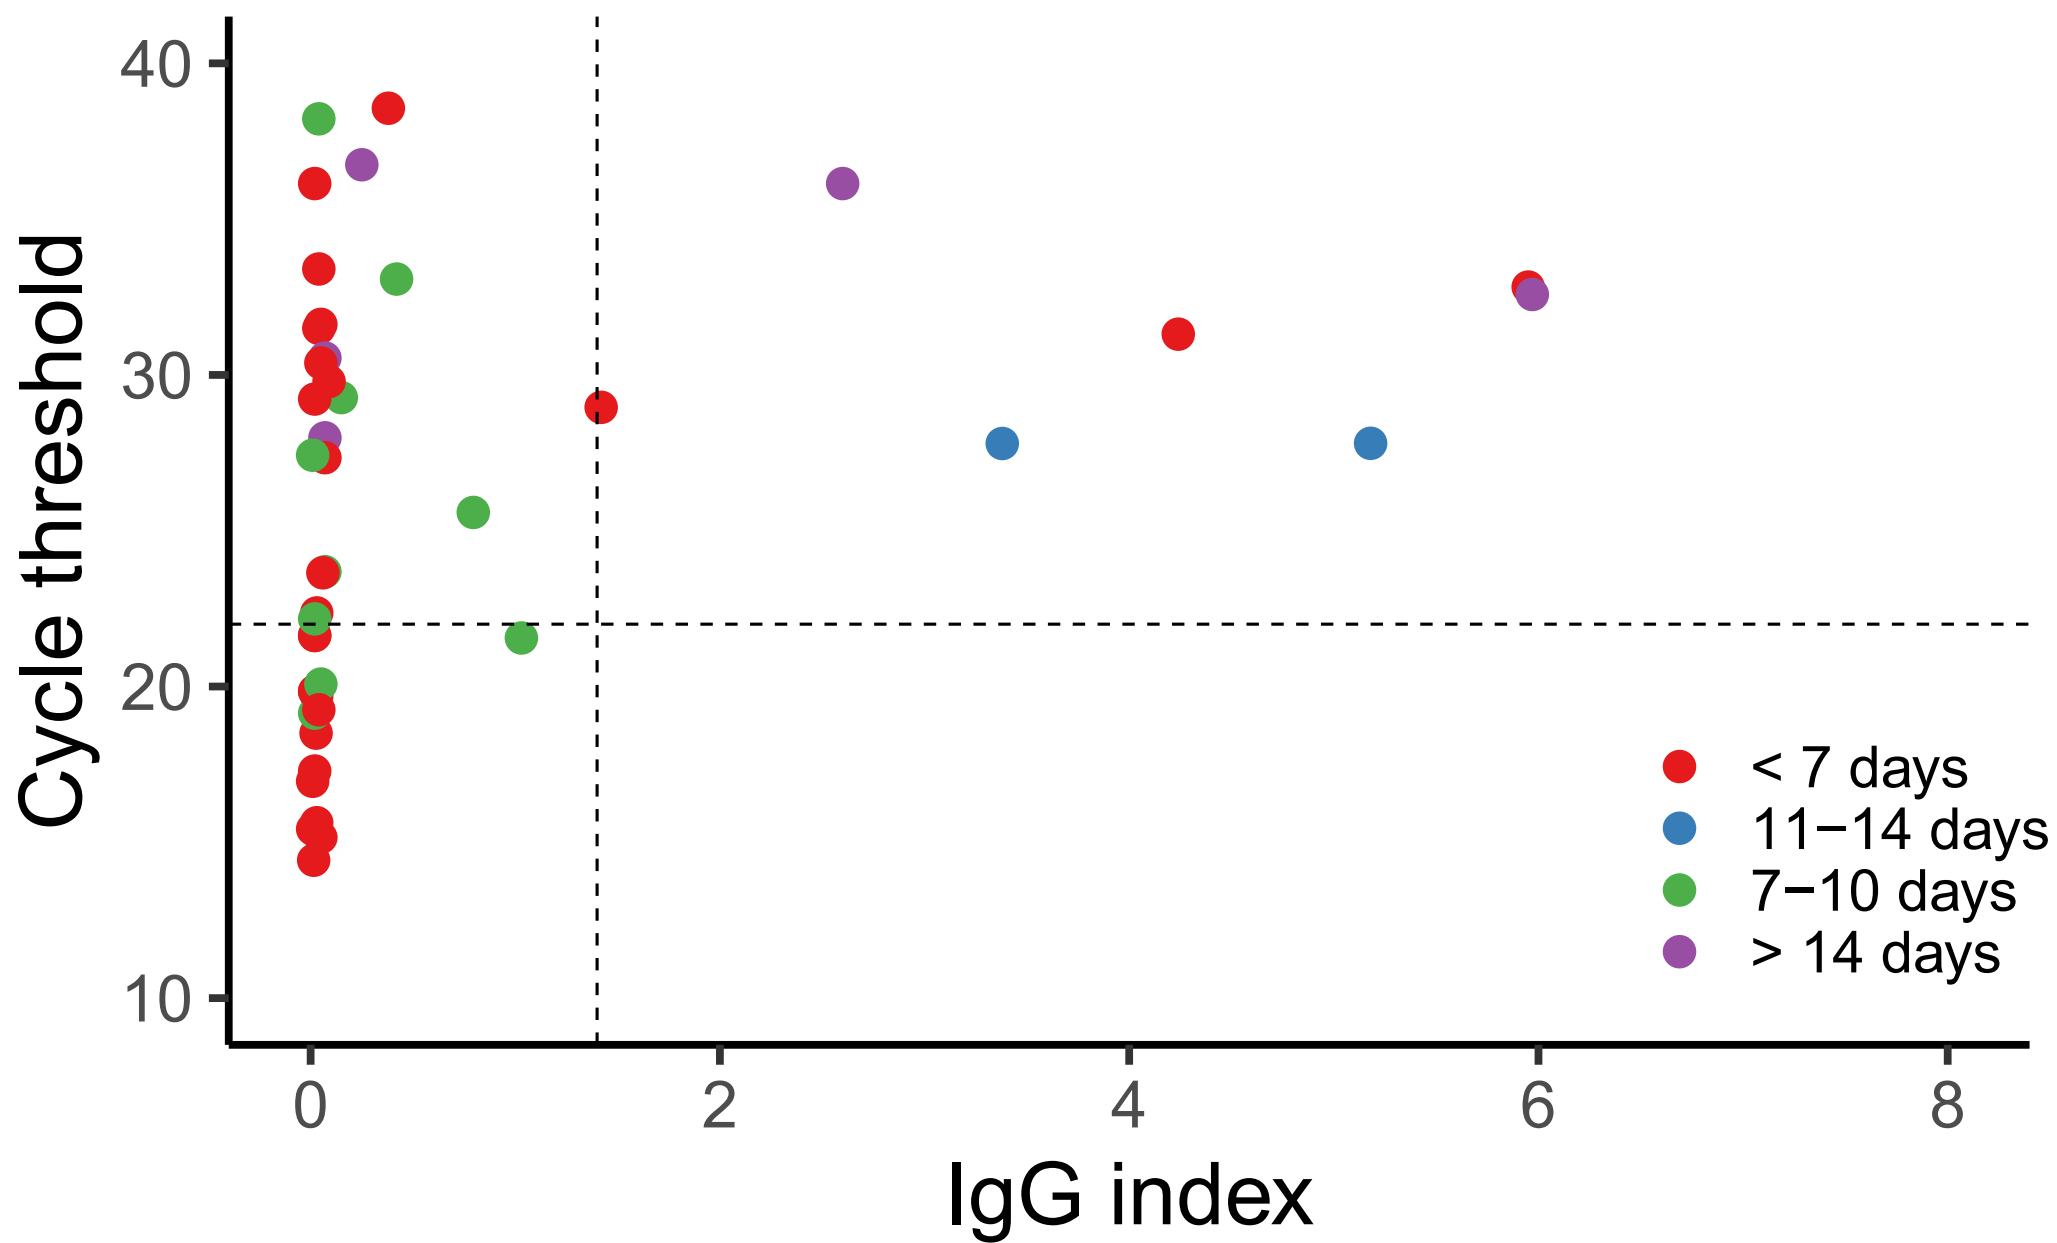

Supplement: ofaa535_suppl_supplementary_figures_s1-s2.pdf [file ofaa535_suppl_supplementary_figures_s1-s2.pdf]
